# Supplementary material
Source: Springer Nature journal article supplement (https://www.springermedizin.de/resource/supplementary/12937_2008_183_MOESM2_ESM.pdf/25654572)

Nasal  
Symptom  
Score

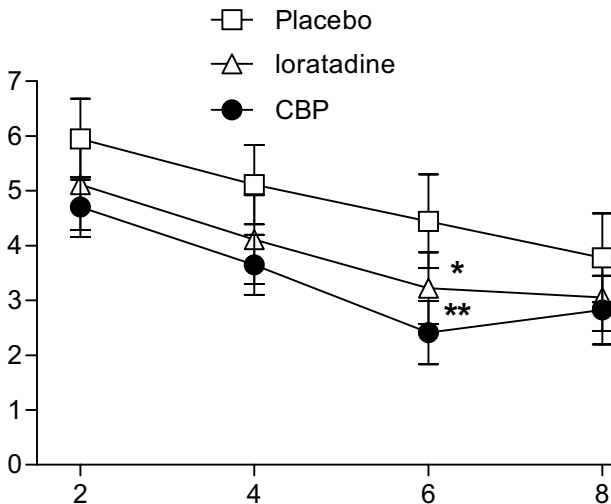

Hours after Nasal Allergen Challenge

\* P = 0.01 vs placebo

\*\* P = 0.007 vs placebo

Supplement: MOESM2 [file 25654572]
